# Supplementary material for: The Relationship between Urban Green Space and Urban Expansion Based on Gravity Methods
Source: MDPI journal article supplement (doi:10.3390/su14095396), 2022-04-29
Supplement: s1 [file s1]

## Supplementary information

**Table S1.** Circular correlations (equivalent to Pearson's correlation) between the mean direction of population, economy, and green space. N represents number of observations and numbers in brackets are p values.

| N=10                       | Population<br>(USA_China) | Economy<br>(USA_China) | Green Space<br>(USA_China) |
|----------------------------|---------------------------|------------------------|----------------------------|
| Population (USA_China)     | 1                         |                        |                            |
| Economy (USA_China)        | 0.67(0.054)               | 1                      |                            |
| Green Space<br>(USA_China) | -0.24(0.46)               | -0.01(0.97)            | 1                          |
| N=5                        | Population (USA)          | Economy (USA)          | Green Space (USA)          |
| Population (USA)           | 1                         |                        |                            |
| Economy (USA)              | 0.82(0.13)                | 1                      |                            |
| Green Space (USA)          | 0.06(0.88)                | 0.07(0.87)             | 1                          |
| N=5                        | Population (China)        | Economy (China)        | Green Space (China)        |
| Population (China)         | 1                         |                        |                            |
| Economy (China)            | 0.39(0.15)                | 1                      |                            |
| Green Space (China)        | 0.004(0.99)               | -0.11(0.74)            | 1                          |

**Table S2.** Spectral and spatial resolution of Landsat bands

| Bands           | Landsat8 OLI/<br>micrometers | Landsat7 ETM+/<br>micrometers | Spatial<br>Resolution |
|-----------------|------------------------------|-------------------------------|-----------------------|
| Coastal aerosol | 0.43-0.45                    | NA                            | 30                    |
| Blue            | 0.45-0.51                    | 0.45-0.52                     | 30                    |
| Green           | 0.53-0.59                    | 0.52-0.60                     | 30                    |
| Red             | 0.64-0.67                    | 0.63-0.69                     | 30                    |
| NIR             | 0.85-0.88                    | 0.77-0.90                     | 30                    |
| SWIR 1          | 1.57-1.65                    | 1.55-1.75                     | 30                    |
| SWIR 2          | 2.11-2.29                    | 2.09-2.35                     | 30                    |

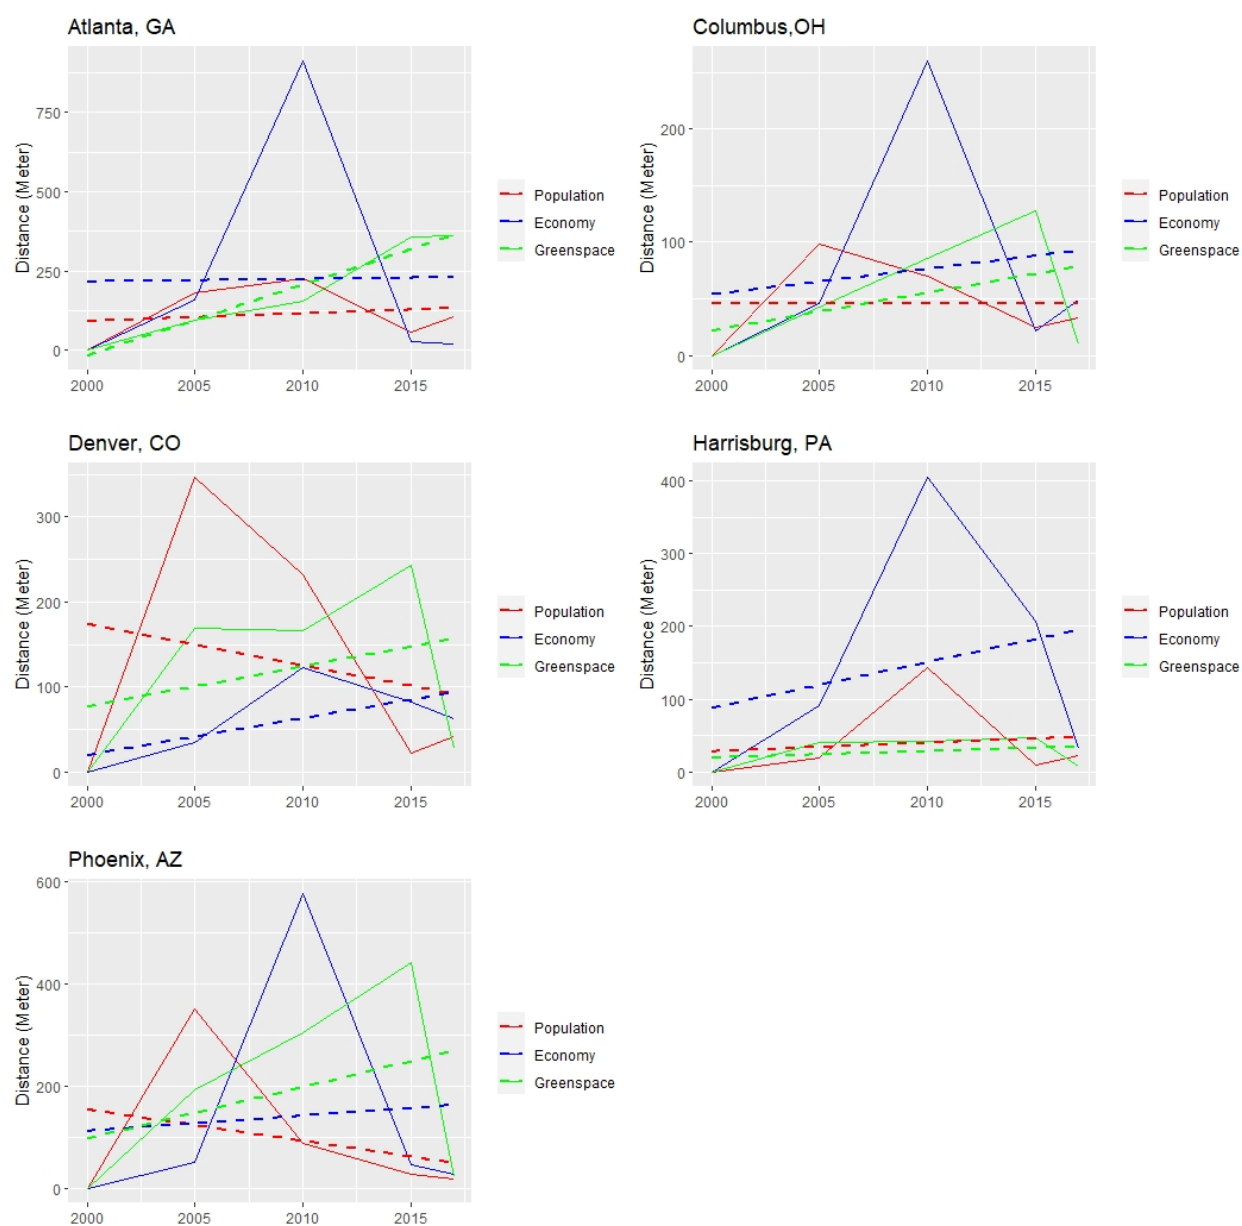

**Figure S1.** The temporal trend of spatial distance moved from one mean center to another in the US.

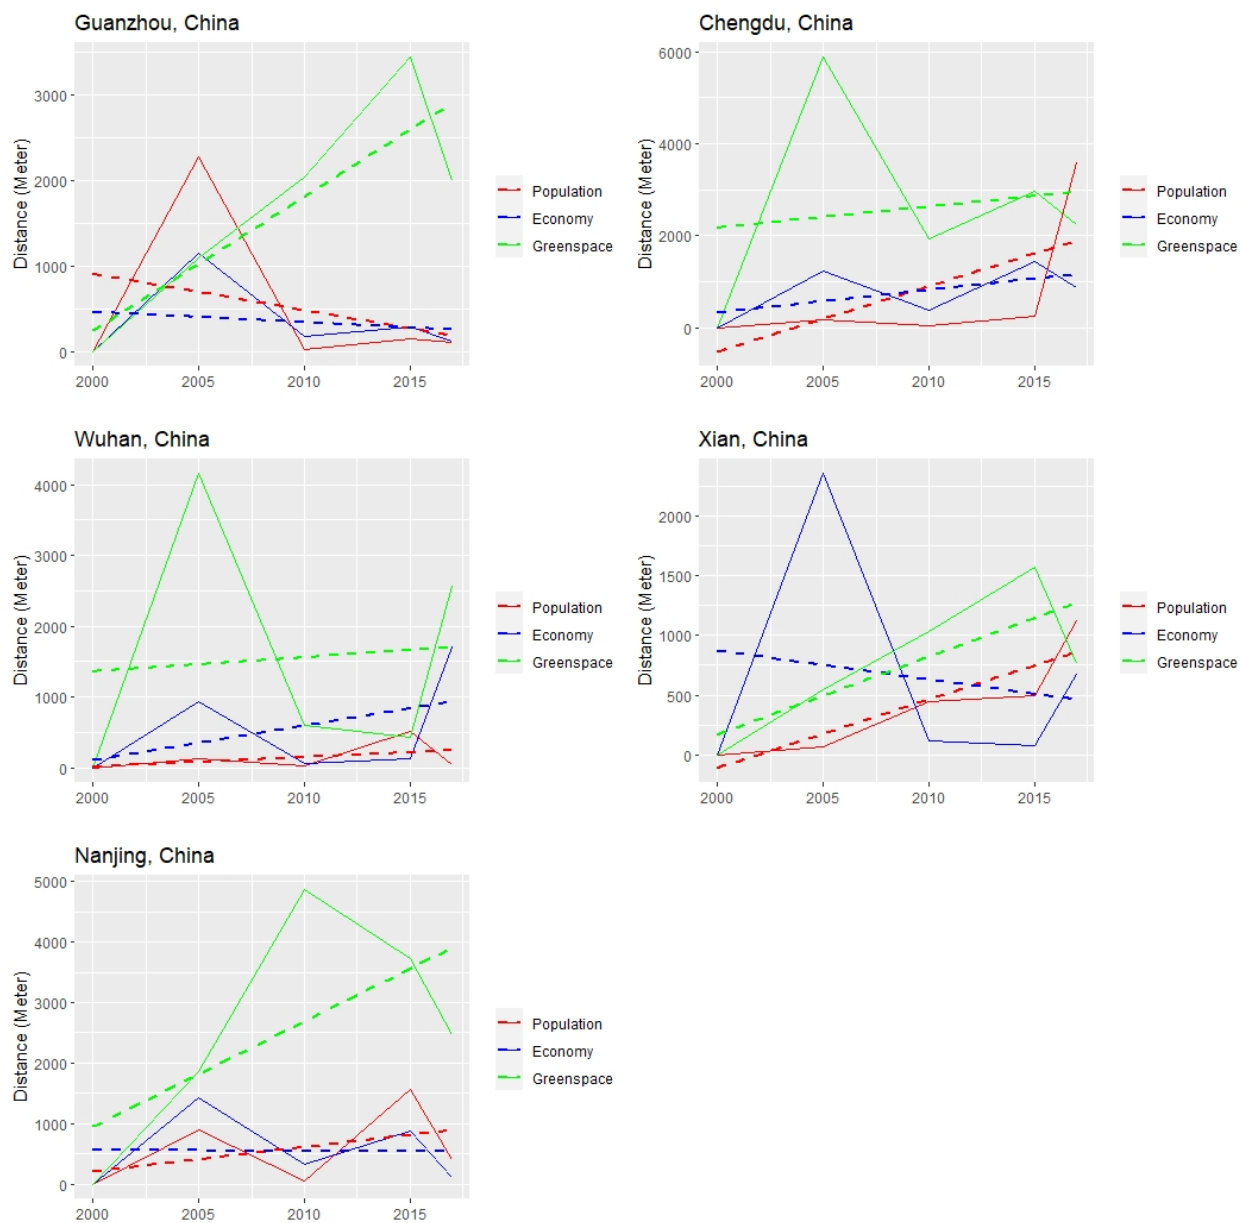

**Figure S2.** The temporal trend of spatial distance moved from one mean center to another in China.
